# Supplementary material for: Association of Neighborhood Deprivation Index With Success in Cancer Care Crowdfunding
Source: PubMed Central journal article supplement (PMC7716189; doi:10.1001/jamanetworkopen.2020.26946), 2020-12-03
Supplement: jamanetwopen-e2026946-s001.pdf [file jamanetwopen-e2026946-s001.pdf]

## Supplemental Online Content

Silver ER, Truong HQ, Ostvar S, Hur C, Tatonetti NP. Association of neighborhood deprivation index with success in cancer care crowdfunding. *JAMA Netw Open*. 2020;3(12):e2026946. doi:10.1001/jamanetworkopen.2020.26946

**eAppendix 1.** Search Terms Used to Determine Cancer Campaigns

**eAppendix 2.** Supplemental Methods: Neighborhood Deprivation Index

**eFigure 1.** US Census Socioeconomic Data by Neighborhood Deprivation Index Quartile

**eTable 1.** Search Terms Used to Determine and Recode Cancer Type

**eTable 2.** Search Terms and Regular Expressions (Regex) Used to Determine and Recode Mentions of Insurance, Out-of-Pocket Costs, and Treatment Type

**eAppendix 3.** Keyword Searches for Deservingness Text Features

**eTable 3.** Associations Between Amount Raised and Campaign Year

**eTable 4.** Spearman Rank Correlations Between Amount Raised and Relevant Continuous Variables

**eTable 5.** Descriptive Statistics for Continuous Variables

**eFigure 2.** Log Amount Raised by Neighborhood Deprivation Index

**eTable 6.** Expected and Observed Counts for Text Indicators by County Socioeconomic Status

**eTable 7.** Full Outputs From Multivariable Regression Model on Amount Raised (Log-Transformed)

**eReferences**

This supplemental material has been provided by the authors to give readers additional information about their work.

**eAppendix 1. Search Terms Used to Determine Cancer Campaigns.** Search terms were used to subset cancer campaigns from all campaigns.

- malignan
- carcinoma
- cancer
- radiation therap
- radiotherap
- immuno therap
- immunotherap
- chemo
- chemotherap
- lymphoma
- sarcoma
- melanoma
- glioblastoma
- myeloma
- neuroblastoma
- astrocytoma
- renal cell
- squamous cell
- medulloblastoma
- adenocarcinoma
- retinoblastoma
- ductal carcinoma
- mastectomy
- neuroendocrine tumor
- histiocytosis
- leukemia
- carcinoid
- leukemia
- germ cell tumor
- desmoplastic
- wilms tumor
- seminoma
- ependymoma
- thymoma
- neuroblastoma
- lumpectomy
- myeloma
- langerhans
- ductile carcinoma
- oligodendroglioma
- wilm's tumor
- clear cell

- non-hodgkins lymphoma
- non hodgkins lymphoma
- neurblastoma
- neruoblastoma
- rhabdomyosaroma
- nuroblastoma
- nonhodgkins lymphoma
- rhabdomyosarcoma

**eAppendix 2. Supplemental Methods: Neighborhood Deprivation Index.** In the first step of the Principal Components Analysis (PCA) to calculate neighborhood deprivation index (NDI) quartiles, we included the following standardized county-level variables (proportions of county populations):

- Unemployment
- Households without a car
- Crowding (households with more than 1 person occupying each room)
- Vacant housing units
- High school completion
- Percent Black or African-American
- Home ownership
- Households headed by a single parent
- Households with annual income < \$35,000
- Poverty
- Households receiving public assistance
- Employment in management, the arts, or science
- Percent without health insurance
- Internet access

The PCA was then run a second time, omitting variables with factor loadings less than 0.25.<sup>1,2</sup> Factor loadings were transformed by multiplying each result by -1 so that higher NDI metrics indicated greater deprivation. Factor loadings served as weights to compute county-level neighborhood deprivation indices (NDIs) based on the county values of the corresponding standardized Census variables. For analysis, we normalized NDIs and grouped the counties into NDI quartiles, with lower quartiles representing less deprivation and higher quartiles representing greater deprivation. NDI quartiles and index scores were matched to campaigns based on the campaign's county FIP code.

| <b>Variable</b>              | <b>Loading: Full PCA</b> | <b>Loading: Reduced PCA</b> |
|------------------------------|--------------------------|-----------------------------|
| Unemployment Rate            | 0.31                     | 0.34                        |
| Poverty Rate                 | 0.39                     | 0.45                        |
| % without Health Insurance   | 0.27                     | 0.32                        |
| Home Ownership Rate          | -0.15                    | NA                          |
| % with >1 Person per Room    | 0.21                     | NA                          |
| % without a Car              | 0.24                     | NA                          |
| % Vacant Units               | 0.08                     | NA                          |
| % with High School Education | -0.34                    | -0.4                        |
| % with Internet Access       | -0.31                    | -0.39                       |
| % African American           | 0.23                     | NA                          |
| % Single Parent              | 0.28                     | 0.29                        |

|                                                |               |               |
|------------------------------------------------|---------------|---------------|
| % with Annual Income < \$35,000                | 0.34          | 0.42          |
| % on Public Assistance                         | 0.16          | NA            |
| % in Management, Arts, and Science Occupations | -0.24         | NA            |
| <b>Variance Explained</b>                      | <b>38.75%</b> | <b>59.25%</b> |

**eFigure 1. US Census Socioeconomic Data by Neighborhood Deprivation Index Quartile.**  
 NDI: Neighborhood Deprivation Index.

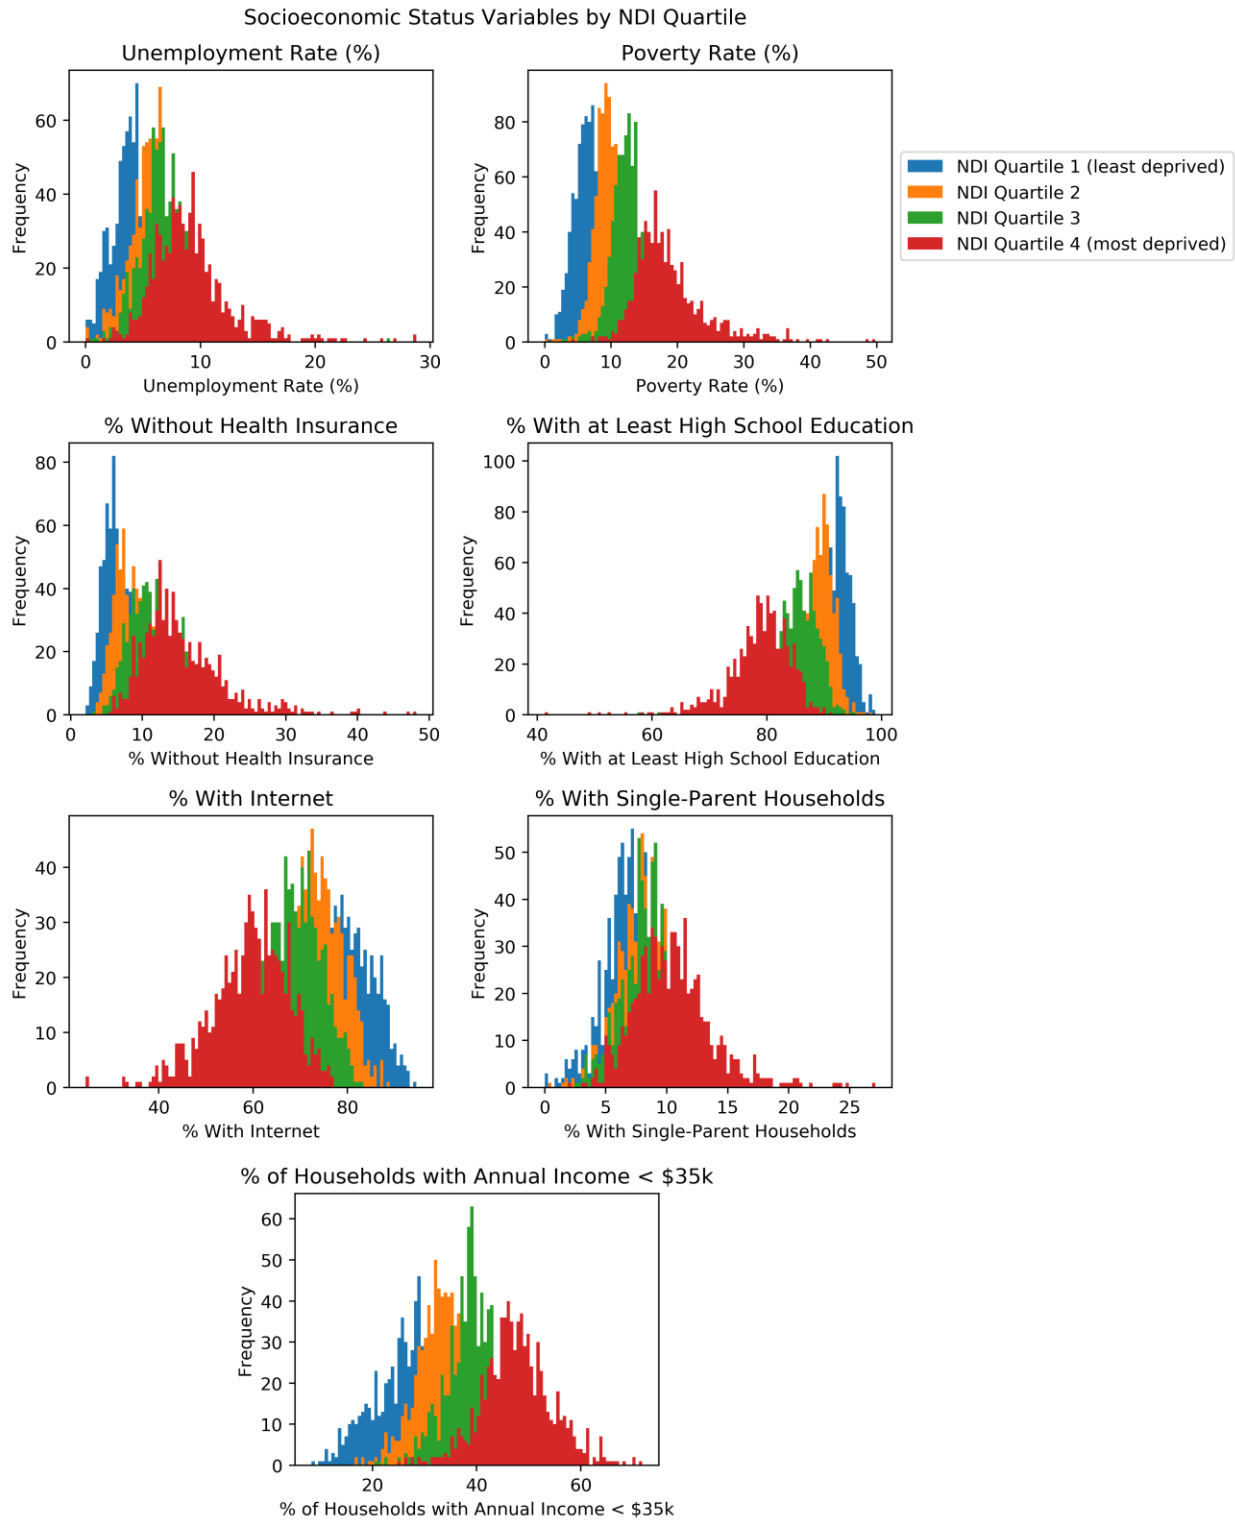

**eTable 1. Search Terms Used to Determine and Recode Cancer Type.**

| <b>Cancer Type</b> | <b>Cancer Type-Recode</b> |
|--------------------|---------------------------|
| breast             | breast                    |
| leukemia           | blood                     |
| lung               | lung                      |
| colon              | gastrointestinal          |
| lymphoma           | blood                     |
| brain              | brain                     |
| kidney             | urologic                  |
| sarcoma            | sarcoma                   |
| stomach            | gastrointestinal          |
| pancreatic         | gastrointestinal          |
| liver              | gastrointestinal          |
| ovarian            | gynecologic               |
| cervical           | gynecologic               |
| bone               | bone                      |
| melanoma           | melanoma                  |
| glioblastoma       | brain                     |
| prostate           | urologic                  |
| myeloma            | blood                     |
| thyroid            | thyroid                   |
| esophageal         | gastrointestinal          |
| uterine            | gynecologic               |
| throat cancer      | head and neck             |
| neuroblastoma      | brain                     |
| uterus             | gynecologic               |
| tongue             | head and neck             |
| testicular         | urologic                  |
| colorectal         | gastrointestinal          |
| bladder            | urologic                  |
| astrocytoma        | brain                     |
| renal cell         | urologic                  |
| squamous cell      | squamous_NOS              |
| pancreas           | gastrointestinal          |
| breat              | breast                    |
| medulloblastoma    | brain                     |
| endometrial        | gynecologic               |
| rectal             | gastrointestinal          |
| skin cancer        | melanoma                  |
| head and neck      | head and neck             |
| cervix             | gynecologic               |
| gallbladder        | gastrointestinal          |
| adenocarcinoma     | adeno_NOS                 |
| gastric            | gastrointestinal          |
| retinoblastoma     | eye                       |
| testicle           | urologic                  |
| esophagus          | gastrointestinal          |

|                          |                  |
|--------------------------|------------------|
| ductal carcinoma         | breast           |
| renal                    | urologic         |
| bile duct                | gastrointestinal |
| mastectomy               | breast           |
| neuroendocrine           | neuroendocrine   |
| peritoneal               | peritoneal       |
| blood cancer             | blood            |
| eye cancer               | eye              |
| intestinal               | gastrointestinal |
| histiocytosis            | histiocytosis    |
| cerebral                 | brain            |
| gastrointestin           | gastrointestinal |
| appendix cancer          | appendix         |
| larynx                   | head and neck    |
| luekemia                 | blood            |
| ovaries                  | gynecologic      |
| carcinoid                | neuroendocrine   |
| lukemia                  | blood            |
| germ cell tumor          | germ cell        |
| rectum                   | gastrointestinal |
| laryngeal                | head and neck    |
| desmoplastic             | sarcoma          |
| wilms tumor              | urologic         |
| seminoma                 | urologic         |
| ependymoma               | brain            |
| germ cell cancer         | germ cell        |
| thymoma                  | brain            |
| urethra                  | urologic         |
| urethral                 | urologic         |
| adrenocortical           | urologic         |
| peritoneum               | peritoneal       |
| nueroblastoma            | brain            |
| lumpectomy               | breast           |
| myloma                   | blood            |
| langerhans               | histiocytosis    |
| ductile carcinoma        | breast           |
| oligodendroglioma        | brain            |
| wilm's tumor             | urologic         |
| penile                   | urologic         |
| ductal carcinoma in situ | breast           |
| clear cell               | clear_cell_NOS   |
| mullerian                | gynecologic      |
| non-hodgkins lymphoma    | blood            |
| non hodgkins lymphoma    | blood            |
| neurblastoma             | brain            |
| neruoblastoma            | brain            |
| rhabdomyosaroma          | sarcoma          |



|                      |         |
|----------------------|---------|
| tyroid               | thyroid |
| nuroblastoma         | brain   |
| nonhodgkins lymphoma | blood   |

**eTable 2. Search Terms and Regular Expressions (Regex) Used to Determine and Recode Mentions of Insurance, Out-of-Pocket Costs, and Treatment Type.**

| <b>Insurance Type</b>           | <b>Insurance Type-Recode</b>      |
|---------------------------------|-----------------------------------|
| medi(.)care                     | medicare                          |
| medi(.)caid                     | medicaid                          |
| medi(.)cade                     | medicaid                          |
| insurance                       | insurance                         |
| insurence                       | insurance                         |
| obama(.)care                    | affordable care act               |
| affordable care act             | affordable care act               |
| the aca                         | affordable care act               |
| tri(.)care                      | public health insurance           |
| champus                         | public health insurance           |
| champva                         | public health insurance           |
| underinsure                     | underinsured                      |
| under(.)insure                  | underinsured                      |
| under-insure                    | underinsured                      |
| no health ins.r.nce             | uninsured                         |
| doesn(.)t have ins.r.nce        | uninsured                         |
| don(.)t have health ins.r.nce   | uninsured                         |
| no ins.r.nce                    | uninsured                         |
| doesn(.)t have health ins.r.nce | uninsured                         |
| un.nsure                        | uninsured                         |
| don(.)t have ins.r.nce          | uninsured                         |
| not insured                     | uninsured                         |
| <b>Out-of-Pocket Costs</b>      | <b>Out-of-Pocket Costs-Recode</b> |
| deduct.ble                      | deductible                        |
| transport                       | transportation                    |
| insur.nce premium               | premium                           |
| out(.)of(.)pocket               | out of pocket                     |
| co(.)pay                        | co-pay                            |
| co(.)payment                    | co-pay                            |
| transportation                  | transportation                    |
| medical bill                    | medical bills                     |
| hospital bill                   | hospital bills                    |
| debt                            | debt                              |
| lost wage                       | lost wages                        |
| isn(.)t covered                 | not covered                       |
| won(.)t cover                   | not covered                       |
| doesn(.)t cover                 | not covered                       |
| not cover                       | not covered                       |

|                         |                              |
|-------------------------|------------------------------|
| not covered             | not covered                  |
| aren(.)t covered        | not covered                  |
| weren(.)t covered       | not covered                  |
| won(.)t be covered      | not covered                  |
| wasn(.)t covered        | not covered                  |
| isn(.)t enough to cover | not covered                  |
| not enough to cover     | not covered                  |
| not be covered          | not covered                  |
| haven(.)t been covered  | not covered                  |
| not been covered        | not covered                  |
| hasn(.)t covered        | not covered                  |
| didn(.)t cover          | not covered                  |
| isn(.)t covered         | not covered                  |
| won(.)t cover           | not covered                  |
| <b>Treatment Type</b>   | <b>Treatment Type-Recode</b> |
| surgery                 | surgery                      |
| chemo                   | chemo                        |
| chemo(.)therapy         | chemo                        |
| immuno                  | immunotherapy                |
| immuno(.)therapy        | immunotherapy                |
| imuno(.)therapy         | immunotherapy                |
| targeted therapy        | targeted therapy             |
| gene therapy            | gene therapy                 |
| hysterectomy            | surgery                      |
| oophorectomy            | surgery                      |
| colectomy               | surgery                      |
| radiation               | radiation                    |
| hormone therapy         | hormone therapy              |
| mastectomy              | surgery                      |
| lumpectomy              | surgery                      |
| surgically removed      | surgery                      |
| \w+[a-z]ectomy          | surgery                      |

### **eAppendix 3. Keyword Searches for Deservingness Text Features.**

#### *Militaristic Metaphors*

- battle
- battling
- battled
- fight
- fighting
- fought
- beat
- beating
- war against
- war with
- kick cancer(.)s .ss
- kick cancer(.)s butt
- warrior
- fighter
- war on

#### *Bravery*

- brave
- courag
- valiant
- valient
- strong
- strength
- hero

#### *Self-Reliance*

- hard(.)working
- independ.nt
- self(.)reli.n
- independ.nt
- stubborn
- proud
- determined
- resilli.nt
- resili.nt
- tenacity
- never ask for
- never asks for
- not ask for
- never asked for
- wouldn(.)t ask for
- won(.)t ask for

- doesn(.)t ask for
- don(.)t ask for

#### *Gratitude*

- thank
- appreciate
- grateful
- greatful
- gratitude
- thanks
- appreciative
- apreciative
- appreciate
- your generosity

#### *Warmth*

- nicest
- kindest
- loving
- sweetest
- caring
- warmest

**eTable 3. Associations Between Amount Raised and Campaign Year.** ANOVA: analysis of variance, SD: standard deviation.

| Campaign Year | Mean (SD)                   | N     | F-Statistic                            |
|---------------|-----------------------------|-------|----------------------------------------|
| 2010          | \$4,927.00 (\$4,032.68)     | 13    | F(1, 143,572) = 191.26,<br>$p < 0.001$ |
| 2011          | \$6,667.70 (\$7,327.06)     | 115   |                                        |
| 2012          | \$6,025.01 (\$9,542.23)     | 682   |                                        |
| 2013          | \$6,333.10<br>(\$13,694.04) | 2874  |                                        |
| 2014          | \$5,973.91<br>(\$10,613.32) | 10366 |                                        |
| 2015          | \$6,518.21 (\$9,663.03)     | 19911 |                                        |
| 2016          | \$8,267.85<br>(\$12,106.13) | 18061 |                                        |
| 2017          | \$6,724.17<br>(\$13,309.90) | 29988 |                                        |
| 2018          | \$6,004.44<br>(\$11,998.87) | 38837 |                                        |
| 2019          | \$5,070.11 (\$9,517.56)     | 22725 |                                        |

**eTable 4. Spearman Rank Correlations Between Amount Raised and Relevant Continuous Variables.**

|                                      | Amount Raised | P-value |
|--------------------------------------|---------------|---------|
| <b>Number of Contributors</b>        | 0.89          | < 0.001 |
| <b>Number of Social Media Shares</b> | 0.54          | < 0.001 |
| <b>Goal Amount (Winsorized)</b>      | 0.48          | < 0.001 |

**eTable 5. Descriptive Statistics for Continuous Variables.**

|                                    | <b>Mean (SD)</b>             | <b>Median (Range)</b>                      | <b>N Missing (%)</b> |
|------------------------------------|------------------------------|--------------------------------------------|----------------------|
| <b>Amount Raised</b>               | \$6,367.77<br>(\$11,611.49)  | \$3,165.00 (\$0.00 -<br>\$1,010,060.00)    | 489.00 (0.34%)       |
| <b>Goal Amount (Winsorized)</b>    | \$18,123.95<br>(\$21,912.28) | \$10,000.00 (\$2,000.00 -<br>\$100,000.00) | 3,826.00 (2.66%)     |
| <b>Number of Contributors</b>      | 64.05 (129.89)               | 36.00 (0.00 - 12,300.00)                   | 7,277.00 (5.05%)     |
| <b>Average Contribution Amount</b> | \$102.98 (\$101.58)          | \$86.56 (\$5.00 -<br>\$15,468.60)          | 7,284.00 (5.06%)     |
| <b>Percent of Goal Raised</b>      | 43.99% (32.19%)              | 36.38% (0.00% -<br>100.00%)                | 4,315.00 (3.00%)     |
| <b>Likes</b>                       | 68.09 (593.18)               | 38.00 (0.00 -<br>209,300.00)               | 12,525.00 (8.69%)    |
| <b>Shares</b>                      | 436.71 (863.09)              | 250.00 (0.00 -<br>104,000.00)              | 8,750.00 (6.07%)     |

**eFigure 2. Log Amount Raised by Neighborhood Deprivation Index.**

Log Amount Raised by Neighborhood Deprivation Index (NDI)

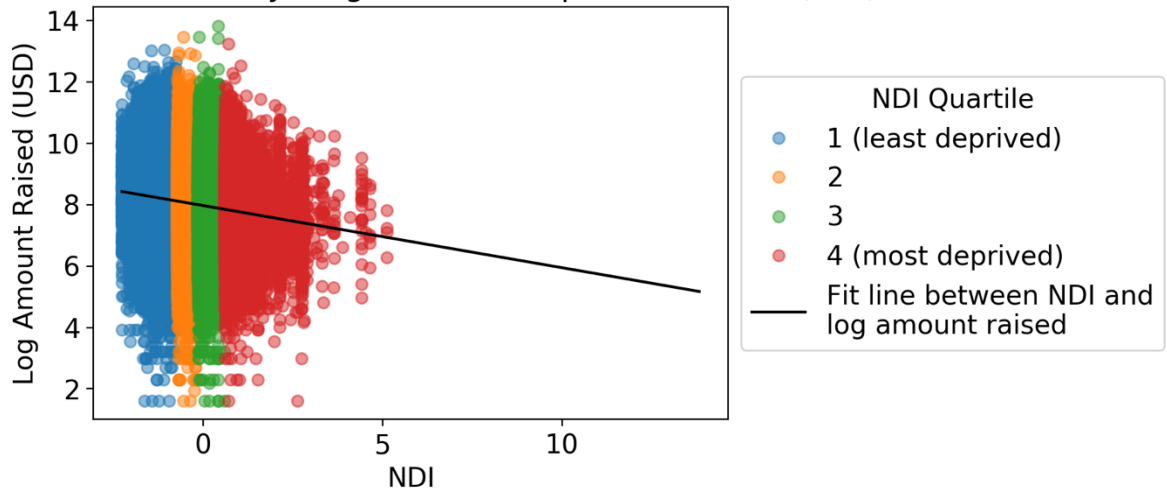

**eTable 6. Expected and Observed Counts for Text Indicators by County Socioeconomic Status.** NDI: Neighborhood Deprivation Index.

| Variable                      | NDI Quartile       |        |        |                   |
|-------------------------------|--------------------|--------|--------|-------------------|
|                               | 1 (Least Deprived) | 2      | 3      | 4 (Most Deprived) |
| Bravery                       |                    |        |        |                   |
| Percent Mentioned             | 30.23%             | 28.53% | 27.83% | 25.74%            |
| Observed False                | 37156              | 30566  | 25702  | 9228              |
| Observed True                 | 16096              | 12203  | 9911   | 3199              |
| Expected False                | 37945              | 30475  | 25376  | 8855              |
| Expected True                 | 15307              | 12294  | 10237  | 3572              |
| Expected True - Observed True | 789                | -91    | -326   | -373              |
| Militaristic Metaphors        |                    |        |        |                   |
| Percent Mentioned             | 58.38%             | 57.01% | 57.03% | 54.43%            |
| Observed False                | 22165              | 18388  | 15302  | 5663              |
| Observed True                 | 31087              | 24381  | 20311  | 6764              |
| Expected False                | 22740              | 18264  | 15208  | 5307              |



|                               |        |        |        |        |
|-------------------------------|--------|--------|--------|--------|
| Expected True                 | 30512  | 24505  | 20405  | 7120   |
| Expected True - Observed True | 575    | -124   | -94    | -356   |
| Cancer Type Mentioned         |        |        |        |        |
| Percent Mentioned             | 83.90% | 83.51% | 82.69% | 81.50% |
| Observed False                | 8571   | 7052   | 6163   | 2299   |
| Observed True                 | 44681  | 35717  | 29450  | 10128  |
| Expected False                | 8903   | 7150   | 5954   | 2078   |
| Expected True                 | 44349  | 35619  | 29659  | 10349  |
| Expected True - Observed True | 332    | 98     | -209   | -221   |
| Insurance Mentioned           |        |        |        |        |
| Percent Mentioned             | 27.56% | 28.20% | 28.61% | 28.16% |
| Observed False                | 38574  | 30708  | 25424  | 8927   |
| Observed True                 | 14678  | 12061  | 10189  | 3500   |
| Expected False                | 38308  | 30767  | 25619  | 8940   |
| Expected True                 | 14944  | 12002  | 9994   | 3487   |
| Expected True - Observed True | -266   | 59     | 195    | 13     |
| Warmth                        |        |        |        |        |
| Percent Mentioned             | 19.73% | 18.10% | 17.06% | 14.79% |
| Observed False                | 42744  | 35029  | 29538  | 10589  |
| Observed True                 | 10508  | 7740   | 6075   | 1838   |
| Expected False                | 43582  | 35002  | 29146  | 10170  |
| Expected True                 | 9670   | 7767   | 6467   | 2257   |

|                               |        |        |        |        |
|-------------------------------|--------|--------|--------|--------|
| Expected True - Observed True | 838    | -27    | -392   | -419   |
| Out-of-Pocket Costs           |        |        |        |        |
| Percent Mentioned             | 41.81% | 40.96% | 39.72% | 37.13% |
| Observed False                | 30988  | 25249  | 21468  | 7813   |
| Observed True                 | 22264  | 17520  | 14145  | 4614   |
| Expected False                | 31612  | 25389  | 21141  | 7377   |
| Expected True                 | 21640  | 17380  | 14472  | 5050   |
| Expected True - Observed True | 624    | 140    | -327   | -436   |
| Self-Reliance                 |        |        |        |        |
| Percent Mentioned             | 15.79% | 14.92% | 14.16% | 12.39% |
| Observed False                | 44841  | 36386  | 30569  | 10887  |
| Observed True                 | 8411   | 6383   | 5044   | 1540   |
| Expected False                | 45350  | 36422  | 30328  | 10583  |
| Expected True                 | 7902   | 6347   | 5285   | 1844   |
| Expected True - Observed True | 509    | 36     | -241   | -304   |
| Gratitude                     |        |        |        |        |
| Percent Mentioned             | 72.12% | 71.48% | 71.43% | 70.70% |
| Observed False                | 14845  | 12196  | 10173  | 3641   |
| Observed True                 | 38407  | 30573  | 25440  | 8786   |
| Expected False                | 15102  | 12129  | 10100  | 3524   |
| Expected True                 | 38150  | 30640  | 25513  | 8903   |
| Expected True -               | 257    | -67    | -73    | -117   |

|                               |        |        |        |        |
|-------------------------------|--------|--------|--------|--------|
| Observed True                 |        |        |        |        |
| Treatment Type                |        |        |        |        |
| Percent Mentioned             | 68.21% | 67.49% | 67.19% | 64.44% |
| Observed False                | 16927  | 13905  | 11684  | 4419   |
| Observed True                 | 36325  | 28864  | 23929  | 8008   |
| Expected False                | 17349  | 13934  | 11603  | 4049   |
| Expected True                 | 35903  | 28835  | 24010  | 8378   |
| Expected True - Observed True | 422    | 29     | -81    | -370   |

**eTable 7. Full Outputs From Multivariable Regression Model on Amount Raised (Log-Transformed).** Coef: Beta coefficient, SE: standard error, CI: confidence interval, ref: reference value.

| <b>Variable</b>                                                         | <b>Coef. (SE)</b> | <b>Percent Difference in Expected Mean (95% CI)</b> | <b>z</b> | <b>P-Value</b> |
|-------------------------------------------------------------------------|-------------------|-----------------------------------------------------|----------|----------------|
| Intercept                                                               | 7.614 (0.329)     | NA                                                  | 23.113   | <0.001         |
| NDI Quartile 2 (ref: NDI Quartile 1, Least Deprived)                    | -0.144 (0.006)    | -13.39% (-14.44%, -12.28%)                          | -22.994  | <0.001         |
| NDI Quartile 3 (ref: NDI Quartile 1, Least Deprived)                    | -0.200 (0.007)    | -18.14% (-19.18%, -17.06%)                          | -30.357  | <0.001         |
| NDI Quartile 4 (Most Deprived) (ref: NDI Quartile 1, Least Deprived)    | -0.302 (0.010)    | -26.07% (-27.46%, -24.65%)                          | -31.3    | <0.001         |
| Warmth is Mentioned (ref: Warmth Not Mentioned)                         | 0.129 (0.007)     | 13.80% (12.30%, 15.26%)                             | 19.549   | <0.001         |
| Gratitude is Mentioned (ref: Gratitude Not Mentioned)                   | 0.001 (0.006)     | 0.09% (-1.00%, 1.21%)                               | 0.156    | 0.876          |
| Self-Reliance is Mentioned (ref: Self-Reliance Not Mentioned)           | 0.051 (0.007)     | 5.23% (3.77%, 6.72%)                                | 7.096    | <0.001         |
| Cancer Type is Mentioned (ref: Cancer Type Not Mentioned)               | 0.091 (0.007)     | 9.58% (8.00%, 11.18%)                               | 12.665   | <0.001         |
| Treatment Type is Mentioned (ref: Treatment Type Not Mentioned)         | 0.064 (0.006)     | 6.58% (5.44%, 7.79%)                                | 11.188   | <0.001         |
| Insurance is Mentioned (ref: Insurance Not Mentioned)                   | 0.014 (0.006)     | 1.39% (0.20%, 2.63%)                                | 2.294    | 0.022          |
| Out-of-Pocket Cost is Mentioned (ref: Out-of-Pocket Cost Not Mentioned) | 0.071 (0.005)     | 7.36% (6.18%, 8.55%)                                | 12.913   | <0.001         |
| Militaristic Metaphors (ref: Militaristic Metaphos Not Used)            | 0.112 (0.005)     | 11.87% (10.74%, 13.09%)                             | 21.335   | <0.001         |
| Bravery is Mentioned (ref: Bravery Not Mentioned)                       | 0.143 (0.006)     | 15.40% (14.11%, 16.65%)                             | 24.801   | <0.001         |

|                        |                |                                 |         |        |
|------------------------|----------------|---------------------------------|---------|--------|
| Year                   |                |                                 |         |        |
| 2011<br>(ref: 2010)    | 0.118 (0.342)  | 12.48%<br>(-42.48%,<br>119.90%) | 0.344   | 0.731  |
| 2012<br>(ref: 2010)    | 0.088 (0.332)  | 9.23%<br>(-43.05%,<br>109.38%)  | 0.266   | 0.79   |
| 2013<br>(ref: 2010)    | 0.019 (0.330)  | 1.94%<br>(-46.58%, 94.64%)      | 0.058   | 0.953  |
| 2014<br>(ref: 2010)    | -0.133 (0.329) | -12.41%<br>(-54.07%, 67.03%)    | -0.402  | 0.688  |
| 2015<br>(ref: 2010)    | -0.048 (0.329) | -4.72%<br>(-50.04%, 81.67%)     | -0.147  | 0.883  |
| 2016<br>(ref: 2010)    | 0.124 (0.329)  | 13.26%<br>(-40.61%,<br>115.98%) | 0.378   | 0.705  |
| 2017<br>(ref: 2010)    | -0.089 (0.329) | -8.54%<br>(-52.05%, 74.37%)     | -0.271  | 0.786  |
| 2018<br>(ref: 2010)    | -0.202 (0.329) | -18.31%<br>(-57.17%, 55.74%)    | -0.614  | 0.539  |
| 2019<br>(ref: 2010)    | -0.404 (0.329) | -33.20%<br>(-64.97%, 27.38%)    | -1.225  | 0.221  |
| Goal Amount            | 0.000 (0.000)  | 0.00% (0.00%,<br>0.00%)         | 92.307  | <0.001 |
| Number of Shares       | 0.000 (0.000)  | 0.01% (0.01%,<br>0.00%)         | 29.405  | <0.001 |
| Number of Contributors | 0.003 (0.000)  | 0.33% (0.30%,<br>0.30%)         | 138.168 | <0.001 |

## eReferences

1. Butler DC, Petterson S, Phillips RL, Bazemore AW. Measures of social deprivation that predict health care access and need within a rational area of primary care service delivery. *Health Serv Res.* 2013;48(2 Pt 1):539-559. doi:10.1111/j.1475-6773.2012.01449.x
2. Messer LC, Laraia BA, Kaufman JS, et al. The development of a standardized neighborhood deprivation index. *J Urban Health.* 2006;83(6):1041-1062. doi:10.1007/s11524-006-9094-x
